# Supplementary material
Source: PubMed Central journal article supplement (PMC4570279)
Supplement: mmc1.pdf [file mmc1.pdf]

The American Journal of Human Genetics

Supplemental Data

**Copy-Number Variation of the Glucose Transporter  
Gene *SLC2A3* and Congenital Heart Defects  
in the 22q11.2 Deletion Syndrome**

Elisabeth E. Mlynarski, Molly B. Sheridan, Michael Xie, Tingwei Guo, Silvia E. Racedo, Donna M. McDonald McGinn, Xiaowu Gai, Eva W.C. Chow, Jacob Vorstman, Ann Swillen, Koen Devriendt, Jeroen Breckpot, Maria Cristina Digilio, Bruno Marino, Bruno Dallapiccola, Nicole Philip, Tony J. Simon, Amy E. Roberts, Małgorzata Piotrowicz, Carrie E. Bearden, Stephan Eliez, Doron Gothelf, Karlene Coleman, Wendy R. Kates, Marcella Devoto, Elaine Zackai, Damian Heine-Suñer, Tamim H. Shaikh, Anne S. Bassett, Elizabeth Goldmuntz, Bernice E. Morrow, Beverly S. Emanuel and the International Chromosome 22q11.2 Consortium

**Figure S1:**

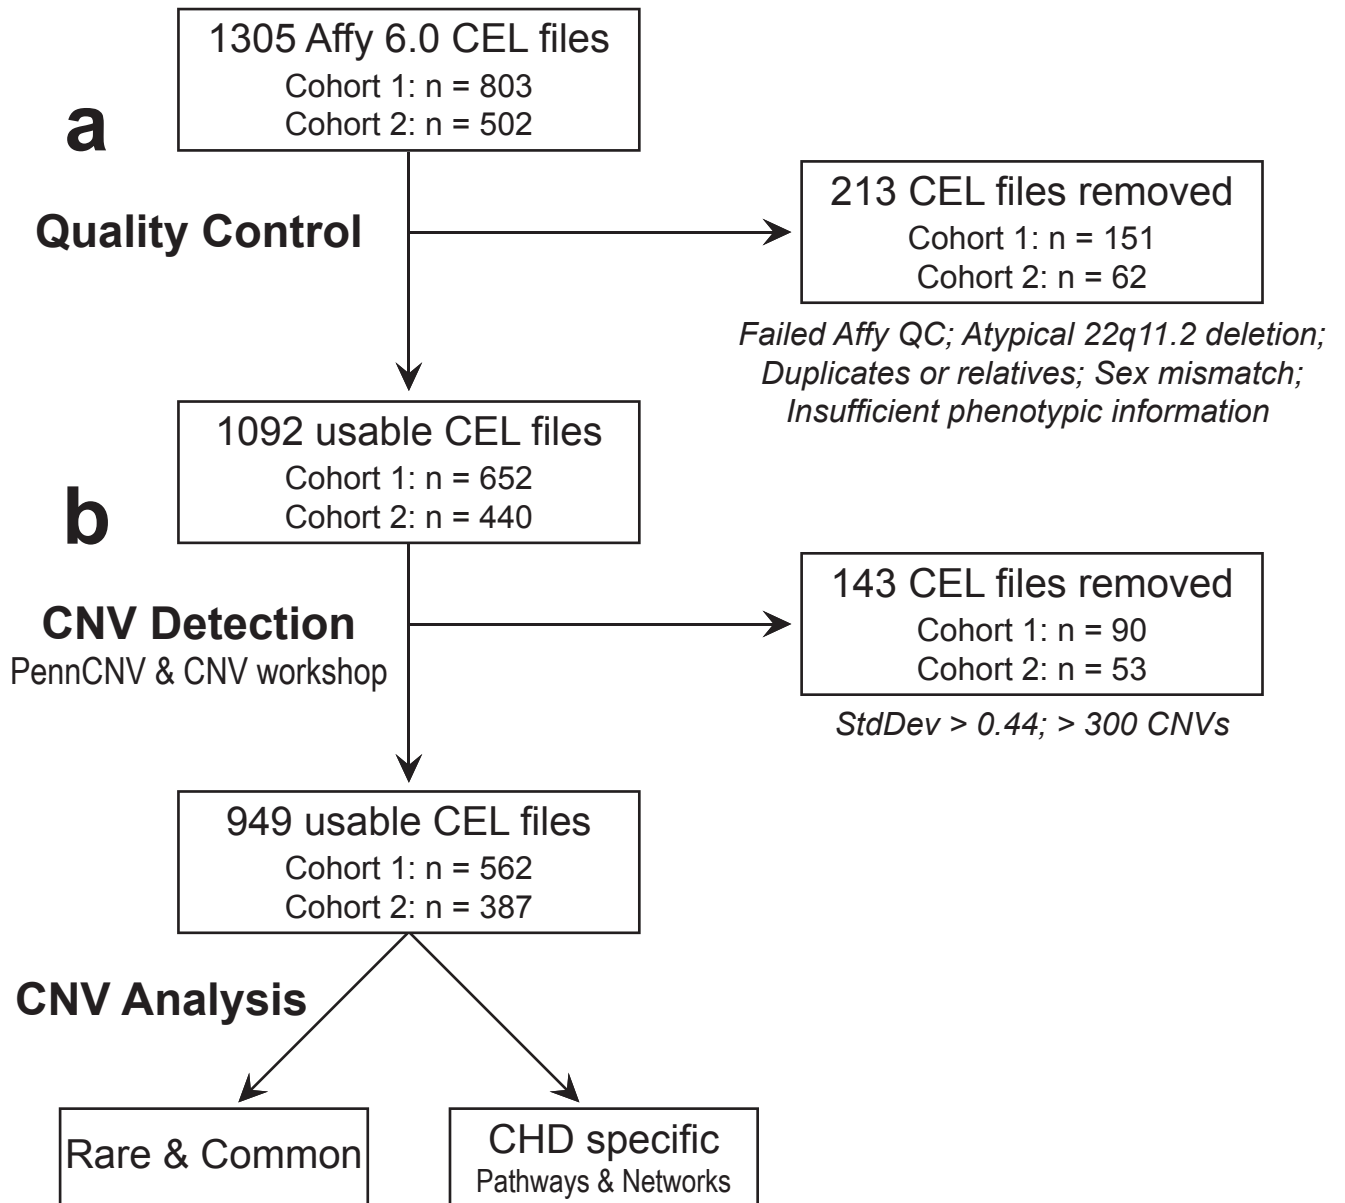

**Figure S1: CNV detection and analysis.** Flow chart representing our CNV detection and analysis and the number of .CEL files from each cohort included at each step. (a) initial assessment of .cel file quality. (b) CNV detection and quality control.

Table S1: 22q11.2 Deletion Sizes

|            | First Cohort <sup>a</sup> |                         |                            | Second Cohort <sup>b</sup> |                         |                            | Cohorts Combined <sup>c</sup> |                         |                            |
|------------|---------------------------|-------------------------|----------------------------|----------------------------|-------------------------|----------------------------|-------------------------------|-------------------------|----------------------------|
|            | Total<br>(n = 562)<br># % | CHD<br>(n = 363)<br># % | No CHD<br>(n = 199)<br># % | Total<br>(n = 387)<br># %  | CHD<br>(n = 240)<br># % | No CHD<br>(n = 147)<br># % | Total<br>(n = 949)<br># %     | CHD<br>(n = 603)<br># % | No CHD<br>(n = 346)<br># % |
| <b>A-D</b> | 534<br>95.0               | 343<br>94.5             | 191<br>96.0                | 358<br>92.5                | 221<br>92.1             | 137<br>93.2                | 892<br>94.0                   | 564<br>93.5             | 328<br>94.8                |
| <b>A-C</b> | 7<br>1.3                  | 5<br>1.4                | 2<br>1.0                   | 8<br>2.1                   | 5<br>2.1                | 3<br>2.0                   | 15<br>1.6                     | 10<br>1.7               | 5<br>1.4                   |
| <b>A-B</b> | 21<br>3.7                 | 15<br>4.1               | 6<br>3.0                   | 21<br>5.4                  | 14<br>5.8               | 7<br>4.8                   | 42<br>4.4                     | 29<br>4.8               | 13<br>3.8                  |

<sup>a</sup> The frequency of the 22q11.2 deletion sizes in first cohort subjects with CHDs, without CHDs and combined.

<sup>b</sup> The frequency of the 22q11.2 deletion sizes in second cohort subjects with CHDs, without CHDs and combined.

<sup>c</sup> Overall 22q11.2 deletion frequencies with the first and second cohorts combined.

**Table S2: Validated CNVs (GRCh37/hg19 genome build)**

| Sample | Phenotype | Chr | Start (bp)  | End (bp)    | Size (bp) | Type        | # of Probes | CNV Detection Programs | Inherited  | Gene(s)         |
|--------|-----------|-----|-------------|-------------|-----------|-------------|-------------|------------------------|------------|-----------------|
| 7462   | CHD       | 1   | 228,807,528 | 228,957,150 | 149,622   | Duplication | 86          | CNV Workshop & PennCNV | Not tested | RHOU            |
| 5471   | CHD       | 2   | 27,263,122  | 27,648,118  | 384,996   | Duplication | 158         | CNV Workshop & PennCNV | Not tested | EMILIN1, TRIM54 |
| 6504   | CHD       | 2   | 32,627,998  | 33,331,779  | 703,781   | Duplication | 453         | CNV Workshop & PennCNV | Not tested | LTBP1           |
| 5373   | CHD       | 2   | 32,630,549  | 33,331,779  | 701,230   | Duplication | 452         | CNV Workshop & PennCNV | Not tested | LTBP1           |
| 6719   | CHD       | 2   | 113,926,885 | 114,236,566 | 309,681   | Duplication | 150         | CNV Workshop & PennCNV | Not tested | PAX8            |
| 4160   | CHD       | 3   | 7,615,567   | 8,156,424   | 540,857   | Duplication | 503         | CNV Workshop & PennCNV | Not tested | GRM7            |
| 6501   | CHD       | 5   | 179,612,667 | 179,883,302 | 270,635   | Duplication | 175         | CNV Workshop & PennCNV | Not tested | MAPK9           |
| 5387   | No CHD    | 9   | 8,748,942   | 8,809,841   | 60,899    | Deletion    | 61          | CNV Workshop & PennCNV | Not tested | PTPRD           |
| 4212   | No CHD    | 9   | 9,798,243   | 9,822,054   | 23,811    | Deletion    | 57          | CNV Workshop & PennCNV | Yes        | PTPRD           |
| 4251   | No CHD    | 9   | 9,847,865   | 9,966,099   | 118,234   | Deletion    | 144         | CNV Workshop & PennCNV | Yes        | PTPRD           |
| 3935   | CHD       | 9   | 80,063,217  | 80,086,725  | 23,508    | Deletion    | 23          | CNV Workshop & PennCNV | Yes        | GNA14           |
| 6516   | CHD       | 9   | 119,411,347 | 119,659,873 | 248,526   | Deletion    | 267         | CNV Workshop & PennCNV | Not tested | ASTN2;TRIM32    |
| 7542   | No CHD    | 10  | 53,383,564  | 53,404,882  | 21,318    | Deletion    | 18          | CNV Workshop & PennCNV | Yes        | PRKG1           |
| 5456   | No CHD    | 10  | 79,250,577  | 79,370,519  | 119,942   | Deletion    | 98          | CNV Workshop & PennCNV | Not tested | KCNMA1          |
| 3920   | CHD       | 12  | 8,004,426   | 8,123,238   | 118,812   | Duplication | 59          | CNV Workshop & PennCNV | Not tested | SLC2A3          |
| 3943   | CHD       | 12  | 7,994,787   | 8,123,900   | 129,113   | Duplication | 25          | CNV Workshop & PennCNV | Not tested | SLC2A3          |
| 4248   | CHD       | 12  | 8,004,426   | 8,130,958   | 126,532   | Duplication | 61          | CNV Workshop & PennCNV | Yes        | SLC2A3          |
| 5355   | No CHD    | 12  | 8,004,425   | 8,123,900   | 119,475   | Duplication | 60          | CNV Workshop & PennCNV | Not tested | SLC2A3          |
| 5368   | CHD       | 12  | 8,004,425   | 8,135,092   | 130,667   | Duplication | 64          | CNV Workshop & PennCNV | Not tested | SLC2A3          |
| 5377   | No CHD    | 12  | 8,004,425   | 8,123,900   | 119,475   | Duplication | 60          | CNV Workshop & PennCNV | Not tested | SLC2A3          |
| 5393   | CHD       | 12  | 8,004,425   | 8,123,900   | 119,475   | Duplication | 60          | CNV Workshop & PennCNV | Not tested | SLC2A3          |
| 5646   | CHD       | 12  | 8,004,425   | 8,123,900   | 119,475   | Duplication | 60          | CNV Workshop & PennCNV | Not tested | SLC2A3          |
| 5647   | CHD       | 12  | 8,004,425   | 8,123,900   | 119,475   | Duplication | 60          | CNV Workshop & PennCNV | Not tested | SLC2A3          |
| 5650   | CHD       | 12  | 8,004,425   | 8,123,900   | 119,475   | Duplication | 60          | CNV Workshop & PennCNV | Not tested | SLC2A3          |
| 6498   | CHD       | 12  | 7,971,035   | 8,143,483   | 172,448   | Duplication | 69          | CNV Workshop & PennCNV | Yes        | SLC2A3          |
| 6522   | CHD       | 12  | 8,004,426   | 8,123,901   | 119,475   | Duplication | 59          | CNV Workshop & PennCNV | Not tested | SLC2A3          |
| 6696   | CHD       | 12  | 7,958,406   | 8,130,958   | 172,552   | Duplication | 72          | CNV Workshop & PennCNV | Not tested | SLC2A3          |
| 6708   | CHD       | 12  | 8,004,426   | 8,123,901   | 119,475   | Deletion    | 60          | CNV Workshop & PennCNV | Yes        | SLC2A3          |
| 6709   | CHD       | 12  | 7,962,762   | 8,123,901   | 161,139   | Duplication | 69          | CNV Workshop & PennCNV | Yes        | SLC2A3          |
| 6953   | CHD       | 12  | 7,994,787   | 8,123,900   | 129,113   | Duplication | 61          | CNV Workshop & PennCNV | Yes        | SLC2A3          |
| 6960   | CHD       | 12  | 7,994,787   | 8,123,900   | 129,113   | Duplication | 56          | CNV Workshop & PennCNV | Yes        | SLC2A3          |
| 6967   | CHD       | 12  | 7,994,787   | 8,150,607   | 155,820   | Duplication | 60          | CNV Workshop & PennCNV | Not tested | SLC2A3          |
| 7530   | CHD       | 12  | 7,994,787   | 8,123,900   | 129,113   | Duplication | 59          | CNV Workshop & PennCNV | Yes        | SLC2A3          |
| 7591   | CHD       | 12  | 8,006,507   | 8,134,669   | 128,162   | Duplication | 61          | CNV Workshop & PennCNV | Not tested | SLC2A3          |
| 7657   | CHD       | 12  | 8,016,749   | 8,090,715   | 73,966    | Duplication | 26          | CNV Workshop & PennCNV | Not tested | SLC2A3          |

|       |        |    |             |             |           |             |      |                        |            |         |
|-------|--------|----|-------------|-------------|-----------|-------------|------|------------------------|------------|---------|
| 10357 | No CHD | 12 | 7,994,787   | 8,123,900   | 129,113   | Duplication | 60   | CNV Workshop & PennCNV | Not tested | SLC2A3  |
| 10553 | CHD    | 12 | 7,970,721   | 8,130,958   | 160,237   | Duplication | 65   | CNV Workshop & PennCNV | Yes        | SLC2A3  |
| 10638 | CHD    | 12 | 7,994,787   | 8,137,722   | 142,935   | Duplication | 65   | CNV Workshop & PennCNV | Not tested | SLC2A3  |
| 10717 | CHD    | 12 | 8,004,425   | 8,135,092   | 130,667   | Duplication | 63   | CNV Workshop & PennCNV | Yes        | SLC2A3  |
| 10904 | CHD    | 12 | 7,994,787   | 8,123,900   | 129,113   | Duplication | 60   | CNV Workshop & PennCNV | Not tested | SLC2A3  |
| 11025 | CHD    | 12 | 8,004,425   | 8,123,900   | 119,475   | Duplication | 59   | PennCNV                | Not tested | SLC2A3  |
| 11159 | CHD    | 12 | 7,994,787   | 8,137,722   | 142,935   | Duplication | 65   | CNV Workshop & PennCNV | Yes        | SLC2A3  |
| 11223 | CHD    | 12 | 7,994,787   | 8,123,900   | 129,113   | Duplication | 60   | CNV Workshop & PennCNV | Not tested | SLC2A3  |
| 11258 | CHD    | 12 | 7,994,787   | 8,123,900   | 129,113   | Duplication | 60   | CNV Workshop & PennCNV | Yes        | SLC2A3  |
| 11292 | CHD    | 12 | 7,994,787   | 8,123,900   | 129,113   | Duplication | 60   | CNV Workshop & PennCNV | Not tested | SLC2A3  |
| 11316 | No CHD | 12 | 8,004,425   | 8,123,900   | 119,475   | Duplication | 59   | PennCNV                | Yes        | SLC2A3  |
| 11322 | CHD    | 12 | 8,004,425   | 8,123,900   | 119,475   | Duplication | 59   | CNV Workshop & PennCNV | Not tested | SLC2A3  |
| 11323 | CHD    | 12 | 8,004,425   | 8,123,900   | 119,475   | Duplication | 59   | CNV Workshop & PennCNV | Not tested | SLC2A3  |
| 11327 | CHD    | 12 | 7,994,787   | 8,123,900   | 129,113   | Duplication | 60   | CNV Workshop & PennCNV | Not tested | SLC2A3  |
| 11336 | CHD    | 12 | 8,004,425   | 8,123,900   | 119,475   | Duplication | 59   | PennCNV                | Not tested | SLC2A3  |
| 11342 | No CHD | 12 | 7,994,787   | 8,123,900   | 129,113   | Duplication | 60   | CNV Workshop & PennCNV | Yes        | SLC2A3  |
| 11960 | CHD    | 12 | 7,994,787   | 8,123,900   | 129,113   | Duplication | 60   | CNV Workshop & PennCNV | Yes        | SLC2A3  |
| 11964 | CHD    | 12 | 7,994,787   | 8,123,900   | 129,113   | Duplication | 60   | CNV Workshop & PennCNV | Yes        | SLC2A3  |
| 11971 | No CHD | 12 | 7,994,787   | 8,123,900   | 129,113   | Duplication | 60   | PennCNV                | Yes        | SLC2A3  |
| 12000 | CHD    | 12 | 8,007,799   | 8,123,900   | 116,101   | Duplication | 57   | CNV Workshop & PennCNV | Not tested | SLC2A3  |
| 5402  | CHD    | 13 | 110,593,018 | 111,185,674 | 592,656   | Duplication | 570  | CNV Workshop & PennCNV | Not tested | COL4A1  |
| 6502  | CHD    | 14 | 64,731,581  | 65,007,547  | 275,966   | Duplication | 184  | CNV Workshop & PennCNV | Not tested | MTHFD1  |
| 5496  | No CHD | 14 | 73,018,692  | 73,188,701  | 170,009   | Duplication | 125  | CNV Workshop & PennCNV | Not tested | DPF3    |
| 5491  | CHD    | 15 | 22,673,400  | 23,478,050  | 804,650   | Duplication | 322  | CNV Workshop & PennCNV | Not tested | 15q11.2 |
| 6948  | CHD    | 15 | 22,681,251  | 23,487,547  | 806,296   | Duplication | 323  | CNV Workshop & PennCNV | Yes        | 15q11.2 |
| 6696  | CHD    | 15 | 22,751,681  | 23,282,812  | 531,131   | Deletion    | 308  | CNV Workshop & PennCNV | Yes        | 15q11.2 |
| 4194  | CHD    | 16 | 14,835,068  | 16,396,512  | 1,561,444 | Deletion    | 679  | CNV Workshop & PennCNV | Yes        | MYH11   |
| 6501  | CHD    | 16 | 82,714,047  | 82,765,607  | 51,560    | Deletion    | 47   | CNV Workshop & PennCNV | Not tested | CDH13   |
| 6700  | CHD    | 16 | 83,308,001  | 83,353,031  | 45,030    | Duplication | 59   | CNV Workshop & PennCNV | Yes        | CDH13   |
| 3935  | CHD    | 17 | 34,816,256  | 36,295,000  | 1,478,744 | Duplication | 996  | CNV Workshop & PennCNV | Yes        | 17q12   |
| 5482  | CHD    | 17 | 72,629,123  | 73,413,449  | 784,326   | Duplication | 382  | CNV Workshop & PennCNV | Not tested | GRB2    |
| 4178  | CHD    | 18 | 23,634,475  | 28,940,034  | 5,305,559 | Deletion    | 3360 | CNV Workshop & PennCNV | Not tested | 18q11.2 |
| 4165  | CHD    | 21 | 18,660,957  | 19,220,122  | 559,165   | Duplication | 374  | CNV Workshop & PennCNV | Not tested | CXADR   |
| 6963  | CHD    | 21 | 18,736,782  | 19,124,700  | 387,918   | Duplication | 295  | CNV Workshop & PennCNV | Not tested | CXADR   |
| 5442  | CHD    | 21 | 35,722,995  | 35,903,830  | 180,835   | Duplication | 109  | CNV Workshop & PennCNV | Yes        | RCAN1   |

**Table S3: Gene Ontology - Common CNVs**

**A: All CNV types (17 statistically significant terms)**

| GO ID      | GO Term Description                               | GO Term Type       | CHD (#) | No CHD (#) | p Value  | padjust_BH | FDR    |
|------------|---------------------------------------------------|--------------------|---------|------------|----------|------------|--------|
| GO:0005996 | monosaccharide metabolic process                  | biological process | 50      | 7          | 2.65E-05 | 0.032536   | 0.0540 |
| GO:0005975 | carbohydrate metabolic process                    | biological process | 78      | 17         | 2.83E-05 | 0.032536   | 0.0275 |
| GO:0044723 | single-organism carbohydrate metabolic process    | biological process | 75      | 17         | 6.80E-05 | 0.039545   | 0.0507 |
| GO:0007275 | multicellular organismal development              | biological process | 45      | 7          | 0.000149 | 0.039545   | 0.0488 |
| GO:0005355 | glucose transmembrane transporter activity        | molecular function | 43      | 7          | 0.000292 | 0.039545   | 0.0166 |
| GO:0006766 | vitamin metabolic process                         | biological process | 43      | 7          | 0.000292 | 0.039545   | 0.0166 |
| GO:0006767 | water-soluble vitamin metabolic process           | biological process | 43      | 7          | 0.000292 | 0.039545   | 0.0166 |
| GO:0008643 | carbohydrate transport                            | biological process | 43      | 7          | 0.000292 | 0.039545   | 0.0166 |
| GO:0008645 | hexose transport                                  | biological process | 43      | 7          | 0.000292 | 0.039545   | 0.0166 |
| GO:0015144 | carbohydrate transmembrane transporter activity   | molecular function | 43      | 7          | 0.000292 | 0.039545   | 0.0166 |
| GO:0015145 | monosaccharide transmembrane transporter activity | molecular function | 43      | 7          | 0.000292 | 0.039545   | 0.0166 |
| GO:0015149 | hexose transmembrane transporter activity         | molecular function | 43      | 7          | 0.000292 | 0.039545   | 0.0166 |
| GO:0015749 | monosaccharide transport                          | biological process | 43      | 7          | 0.000292 | 0.039545   | 0.0166 |
| GO:0015758 | glucose transport                                 | biological process | 43      | 7          | 0.000292 | 0.039545   | 0.0166 |
| GO:0019852 | L-ascorbic acid metabolic process                 | biological process | 43      | 7          | 0.000292 | 0.039545   | 0.0166 |
| GO:0051119 | sugar transmembrane transporter activity          | molecular function | 43      | 7          | 0.000292 | 0.039545   | 0.0166 |
| GO:1901476 | carbohydrate transporter activity                 | molecular function | 43      | 7          | 0.000292 | 0.039545   | 0.0166 |

**B: Duplications (28 statistically significant terms)**

| GO ID      | GO Term Description                             | GO Term Type       | CHD (#) | No CHD (#) | p Value  | padjust_BH | FDR    |
|------------|-------------------------------------------------|--------------------|---------|------------|----------|------------|--------|
| GO:0044723 | single-organism carbohydrate metabolic process  | biological process | 41      | 3          | 4.13E-06 | 0.003262   | 0      |
| GO:0005975 | carbohydrate metabolic process                  | biological process | 44      | 4          | 5.68E-06 | 0.003262   | 0      |
| GO:0005996 | monosaccharide metabolic process                | biological process | 40      | 3          | 6.21E-06 | 0.003262   | 0      |
| GO:0055085 | transmembrane transport                         | biological process | 36      | 3          | 3.11E-05 | 0.004497   | 0.0005 |
| GO:0044281 | small molecule metabolic process                | biological process | 46      | 6          | 3.55E-05 | 0.004497   | 0.0004 |
| GO:0005355 | glucose transmembrane transporter activity      | molecular function | 34      | 3          | 6.85E-05 | 0.004497   | 0.0016 |
| GO:0006766 | vitamin metabolic process                       | biological process | 34      | 3          | 6.85E-05 | 0.004497   | 0.0016 |
| GO:0006767 | water-soluble vitamin metabolic process         | biological process | 34      | 3          | 6.85E-05 | 0.004497   | 0.0016 |
| GO:0007275 | multicellular organismal development            | biological process | 34      | 3          | 6.85E-05 | 0.004497   | 0.0016 |
| GO:0007276 | gamete generation                               | biological process | 34      | 3          | 6.85E-05 | 0.004497   | 0.0016 |
| GO:0007283 | spermatogenesis                                 | biological process | 34      | 3          | 6.85E-05 | 0.004497   | 0.0016 |
| GO:0008643 | carbohydrate transport                          | biological process | 34      | 3          | 6.85E-05 | 0.004497   | 0.0016 |
| GO:0008645 | hexose transport                                | biological process | 34      | 3          | 6.85E-05 | 0.004497   | 0.0016 |
| GO:0015144 | carbohydrate transmembrane transporter activity | molecular function | 34      | 3          | 6.85E-05 | 0.004497   | 0.0016 |

|            |                                                   |                    |    |    |          |          |        |
|------------|---------------------------------------------------|--------------------|----|----|----------|----------|--------|
| GO:0015145 | monosaccharide transmembrane transporter activity | molecular function | 34 | 3  | 6.85E-05 | 0.004497 | 0.0016 |
| GO:0015149 | hexose transmembrane transporter activity         | molecular function | 34 | 3  | 6.85E-05 | 0.004497 | 0.0016 |
| GO:0015749 | monosaccharide transport                          | biological process | 34 | 3  | 6.85E-05 | 0.004497 | 0.0016 |
| GO:0015758 | glucose transport                                 | biological process | 34 | 3  | 6.85E-05 | 0.004497 | 0.0016 |
| GO:0019752 | carboxylic acid metabolic process                 | biological process | 34 | 3  | 6.85E-05 | 0.004497 | 0.0016 |
| GO:0019852 | L-ascorbic acid metabolic process                 | biological process | 34 | 3  | 6.85E-05 | 0.004497 | 0.0016 |
| GO:0030154 | cell differentiation                              | biological process | 34 | 3  | 6.85E-05 | 0.004497 | 0.0016 |
| GO:0048232 | male gamete generation                            | biological process | 34 | 3  | 6.85E-05 | 0.004497 | 0.0016 |
| GO:0051119 | sugar transmembrane transporter activity          | molecular function | 34 | 3  | 6.85E-05 | 0.004497 | 0.0016 |
| GO:1901476 | carbohydrate transporter activity                 | molecular function | 34 | 3  | 6.85E-05 | 0.004497 | 0.0016 |
| GO:0006082 | organic acid metabolic process                    | biological process | 36 | 4  | 0.000123 | 0.007459 | 0.0020 |
| GO:0043436 | oxoacid metabolic process                         | biological process | 36 | 4  | 0.000123 | 0.007459 | 0.0020 |
| GO:0048869 | cellular developmental process                    | biological process | 35 | 4  | 0.000178 | 0.010416 | 0.0025 |
| GO:0044710 | single-organism metabolic process                 | biological process | 80 | 22 | 0.000483 | 0.027198 | 0.0071 |

**C: Deletions (none are significant - top 5 are shown)**

| GO ID      | GO Term Description                   | GO Term Type       | CHD (#) | No CHD (#) | p Value  | padjust_BH | FDR |
|------------|---------------------------------------|--------------------|---------|------------|----------|------------|-----|
| GO:0031424 | keratinization                        | biological process | 274     | 136        | 0.038366 | 0.921843   | 1   |
| GO:0044707 | single-multicellular organism process | biological process | 346     | 178        | 0.044478 | 0.921843   | 1   |
| GO:0016021 | integral component of membrane        | cellular component | 277     | 141        | 0.069179 | 0.921843   | 1   |
| GO:0044430 | cytoskeletal part                     | cellular component | 86      | 39         | 0.112198 | 0.921843   | 1   |
| GO:0044446 | intracellular organelle part          | cellular component | 164     | 81         | 0.113582 | 0.921843   | 1   |

p Value = two-tailed Fisher's exact test

padjust\_BH = B-H adjusted p Value

FDR = false discovery rate



**Table S4: Mammalian Phenotype - Common CNVs**

**A: All CNV types (none are significant - top 5 are shown)**

| MP ID      | MP Term Description                       | CHD (#) | No CHD (#) | p Value  | padjust_BH | FDR    |
|------------|-------------------------------------------|---------|------------|----------|------------|--------|
| MP:0011091 | complete prenatal lethality               | 47      | 8          | 0.000205 | 0.086782   | 0.1470 |
| MP:0001488 | increased startle reflex                  | 43      | 7          | 0.000292 | 0.086782   | 0.0273 |
| MP:0004264 | abnormal extraembryonic tissue physiology | 43      | 7          | 0.000292 | 0.086782   | 0.0273 |
| MP:0004265 | abnormal placental transport              | 43      | 7          | 0.000292 | 0.086782   | 0.0273 |
| MP:0010038 | abnormal placenta physiology              | 43      | 7          | 0.000292 | 0.086782   | 0.0273 |

**B: Duplications (14 statistically significant terms)**

| MP ID      | MP Term Description                                                | CHD (#) | No CHD (#) | p Value  | padjust_BH | FDR    |
|------------|--------------------------------------------------------------------|---------|------------|----------|------------|--------|
| MP:0001488 | increased startle reflex                                           | 34      | 3          | 0.000068 | 0.011375   | 0.0013 |
| MP:0003088 | abnormal prepulse inhibition                                       | 34      | 3          | 0.000068 | 0.011375   | 0.0013 |
| MP:0004264 | abnormal extraembryonic tissue physiology                          | 34      | 3          | 0.000068 | 0.011375   | 0.0013 |
| MP:0004265 | abnormal placental transport                                       | 34      | 3          | 0.000068 | 0.011375   | 0.0013 |
| MP:0009142 | decreased prepulse inhibition                                      | 34      | 3          | 0.000068 | 0.011375   | 0.0013 |
| MP:0010038 | abnormal placenta physiology                                       | 34      | 3          | 0.000068 | 0.011375   | 0.0013 |
| MP:0011095 | complete embryonic lethality between implantation and placentation | 34      | 3          | 0.000068 | 0.011375   | 0.0013 |
| MP:0011091 | complete prenatal lethality                                        | 37      | 4          | 0.000085 | 0.012442   | 0.0011 |
| MP:0009850 | embryonic lethality between implantation and placentation          | 36      | 4          | 0.000123 | 0.014403   | 0.0013 |
| MP:0011090 | partial perinatal lethality                                        | 36      | 4          | 0.000123 | 0.014403   | 0.0013 |
| MP:0001363 | increased anxiety-related response                                 | 34      | 4          | 0.000258 | 0.02158    | 0.0016 |
| MP:0001486 | abnormal startle reflex                                            | 34      | 4          | 0.000258 | 0.02158    | 0.0016 |
| MP:0001961 | abnormal reflex                                                    | 34      | 4          | 0.000258 | 0.02158    | 0.0016 |
| MP:0004994 | abnormal brain wave pattern                                        | 34      | 4          | 0.000258 | 0.02158    | 0.0016 |

**C: Deletions (none are significant - top 5 are shown)**

| MP ID      | MP Term Description                   | CHD (#) | No CHD (#) | p Value  | padjust_BH | FDR |
|------------|---------------------------------------|---------|------------|----------|------------|-----|
| MP:0000278 | abnormal myocardial fiber morphology  | 101     | 46         | 0.092162 | 0.967473   | 1   |
| MP:0004087 | abnormal muscle fiber morphology      | 101     | 46         | 0.092162 | 0.967473   | 1   |
| MP:0004937 | dilated heart                         | 101     | 46         | 0.092162 | 0.967473   | 1   |
| MP:0002972 | abnormal cardiac muscle contractility | 107     | 50         | 0.109976 | 0.967473   | 1   |
| MP:0000274 | enlarged heart                        | 107     | 50         | 0.109976 | 0.967473   | 1   |

p Value = two-tailed Fisher's exact test

padjust\_BH = B-H adjusted p Value

FDR = false discovery rate

**Table S5: qPCR primers used in CNV validation**

| Primer Name      | Primer Sequence 5' -> 3'       |
|------------------|--------------------------------|
| RPPH1F (control) | GCGGACGGAAGCTCATCAG            |
| RPPH1R (control) | TCAGACCTTCCCAAGGGACAT          |
| ASTN2e10F        | ACTCACCCGCAGAACATGAAG          |
| ASTN2e10R        | TGCCCTGCCCTACGAT               |
| ASTN2e12F        | CCTGTGGAGAGGAGCAGAGAGA         |
| ASTN2e12R        | GCCCTGTAGTCCCTCAGCAGTCT        |
| ASTN2e16F        | CCTGAAATGAGCTGGTCATCTG         |
| ASTN2e16R        | CATCACCTACCTCTCAGGTTTGC        |
| ASTN2i9F         | AGGAGGAGCCCAGGATTAGTG          |
| ASTN2i9R         | AAGAACATCTCACATTTTGGGAGAA      |
| ASTNi16F         | TGTTCAAAAACAACAGCACAAAGGT      |
| ASTNi16R         | GATGATGCCTTCTGCCTAAGCT         |
| CDH13e1F         | TCCCACGAAAATATGCTCAGT          |
| CDH13e1R         | CCGGCGGCGTTTTCA                |
| CDH13i1aF        | GTGGGCACCACTTGAGACAGT          |
| CDH13i1aR        | GGTTTACCGGCCAGACACA            |
| CDH13i1bF        | ACGTGAGCCACCTGTGAA             |
| CDH13i1bR        | AGCTTCTGGTGCTGGACAT            |
| CDH13e2F         | GAAAGTTAGCAGGGCAAACACA         |
| CDH13e2R         | CAGCACCTGAGAAAACCAAAGC         |
| CDH13e5F         | CACTGGAAAGGGAGTGGATCA          |
| CDH13e5R         | CGCTCCCTGTGTTCTCATTGA          |
| CDH13i5aF        | AAAAGAAGAAAGGCAGGATAATCAAT     |
| CDH13i5aR        | CCATCCAAATGCAAGGTCATAA         |
| CDH13i5bF        | GGGATCCCAGCGAGCATAAC           |
| CDH13i5bR        | GGTGGTTGGAGAGGACTTATTCC        |
| CDH13e6F         | TGCCTCTGGAAGTCATTGTGAT         |
| CDH13e6R         | GGGCCTTCCCGAAAGATC             |
| COL4A1+205kbF    | AGGGCCACAGAGACTTGGAA           |
| COL4A1+205kbR    | TGTCCTGACCCCATCTATCA           |
| COL4A1+212kbF    | CATCACCTGGAAAAAAGGTCTGA        |
| COL4A1+212kbR    | GCCTGGGCTCACTCTCTTCA           |
| COL4A1-222kbF    | CCCTGGTGGTGAGGGAAAC            |
| COL4A1-222kbR    | AGTGTGGCTGATCAGACATTGG         |
| COL4A1-227kbF    | GAGGCCGAGCCCTACA               |
| COL4A1-227kbR    | TTGACCGGCACACTCGTACA           |
| COL4A1e49F       | CAGCCAGTACGAGTAGTCATTTCG       |
| COL4A1e49R       | GCCCTTCTGTTCTGCAATATT          |
| COL4A1e50F       | TGGCGTCTCCCAGACA               |
| COL4A1e50R       | GGTGGTCTCGCTGTGGAT             |
| COL4A1i49F       | CAAAGCAGCAGCTTCAAGTACA         |
| COL4A1i49R       | ACACATCGAAGCTCAGCATGA          |
| CXADR-275kbF     | GTGGATTGAGCTACCCTGCAA          |
| CXADR-275kbR     | CCAGACACCTCGGCTAGTCTTT         |
| CXADR-148kbF     | GGCTTAAAATGGTGGCTTTATCC        |
| CXADR-148kbR     | GAATAGAATGAAGGAAATTAATGGTTAAGG |
| CXADRRe6F        | GCTTCAAATAAAGCTGGACTAATTGC     |
| CXADRRe6R        | TGATAAGACCAATGAGCGCTAGAG       |
| CXADR+274kbF     | TCTGACCCCAAGGACCTCTA           |
| CXADR+274kbR     | TGCCTTATGCTTTTCCAATTAATC       |
| CXADR+292kbF     | GATGCTCTTCCCCTTTGCTT           |
| CXADR+292kbR     | GGTAAATCTTTAGATGAGCCTGTTTG     |
| DEFB-347kbF      | CTCCTCTGCTCGTGCCTTTC           |
| DEFB-347kbR      | GGTGTTCAAGGTCCTGCTCTAG         |
| DEFB-335kbF      | AGCCACCATCACTGTCAATCC          |
| DEFB-335kbR      | CCCCAGAGCCCAATTCTC             |
| DEFBe1F          | TGACGGCCGAGGTGAGA              |

| Primer Name  | Primer Sequence 5' -> 3'   |
|--------------|----------------------------|
| DEFBe1R      | CCCCGTCGGTATAAGGATGA       |
| DEFB+6kbF    | TGCCTTGGTGGCCTCTAGTG       |
| DEFB+6kbR    | AACACGCTTGCAGCTCTGACT      |
| DEFB+38kbF   | CCCATGTACTCCCTGCAGTATTT    |
| DEFB+38kbR   | TTCCGCTCGTCCGTCAA          |
| GNA14i2aF    | GAGCATCCTCCAGGGAAAG        |
| GNA14i2aR    | CCCCTAAATTTTGTGCCCTAGA     |
| GNA14i2bF    | GGAGAATGCTCACGGGTACAG      |
| GNA14i2bR    | CCCCACCCAGAGGTTTCAGT       |
| GNA14i2cF    | CATTTCATCAGGCATGCGTGTA     |
| GNA14i2cR    | CTCGAATAATGCCTGGCAAAG      |
| GNA14i2dF    | CGAGCACTAAGACCTCCTCGTT     |
| GNA14i2dR    | TCCTGTCTGGTGTACCTGCACTT    |
| GRB2-19kbF   | CTCTCCTGAGCATACCTGTATTGC   |
| GRB2-19kbR   | GGTCGTAATCTACAAAGCGTTTTG   |
| GRB2-231F    | TCCCCCGTCTAATCACTTTATTTT   |
| GRB2-231R    | GCCCCCTACCCATCCAAGT        |
| GRB2e3F      | GAAGCCGCTTTTTCCATTAAGC     |
| GRB2e3R      | CAGGTTTTGAACGAAGAATGTGAT   |
| GRB2+673kbF  | GGGCTGACCATGCTACAGAGA      |
| GRB2+673kbR  | GGGAGGCACCAAAGCAGAA        |
| GRB2+695kbF  | CTGCTAGAATTGCCCTTTCCA      |
| GRB2+695kbR  | GCGCAGGTCCTCTGAAAA         |
| GRM7i7F      | GCAAAGATCAGAAAGGATGATTCA   |
| GRM7i7R      | CTTGCCAGGAGCAAACAGAT       |
| GRM7e8F      | GCCTTCATTCCAATTTTTTTTGG    |
| GRM7e8R      | TGATGTGCATTTTCACTTACCTTTTC |
| GRM7e14F     | CCAAAGGAGTGTGAAACTCAA      |
| GRM7e14R     | GGCTCTCAGTGGTCCATTCTAAA    |
| GRM7+370kbF  | TCAAATCTGGCTTCCAGGAACT     |
| GRM7+370kbR  | GAGGAAGATCTAGCCAATGGAAGA   |
| GRM7+373kbF  | TGGAGGAGGGAGAAACCATTT      |
| GRM7+373kbR  | GAGAATCACCTCCTTTGGATGTCT   |
| KCNMA1e1F    | AGAGGCCCCCGAAGAAAGT        |
| KCNMA1e1R    | GCATGTGGTGGGCTTTTCC        |
| KCNMA1i1aF   | GGGTGTCATTAGGGTCTGTGGAT    |
| KCNMA1i1aR   | GGGTATTTGAACCGGGTGTATT     |
| KCNMA1i1bF   | GACAGGCATGGTGCTTCCGA       |
| KCNMA1i1bR   | GCGAGGCTTCTCCAAGTGT        |
| KCNMA1i1cF   | CAGGAAGAGCCACCAAGAGTTT     |
| KCNMA1i1cR   | AAGGTGCCTGTGGGCTATTAG      |
| LTBP1e2F     | CAGCGATCTTGCTTTGTTTCAG     |
| LTBP1e2R     | GGCCTTACTCCAGCCATGAC       |
| LTBP1e4F     | GACCCAGGAATACGTGCTCAA      |
| LTBP1e4R     | GTGGACTGCTCTCCTGAAATCC     |
| LTBP1e3F     | CCATGTCAGAATGGAGGGATGT     |
| LTBP1e3R     | TGGTCCCTGGTTTACACACACA     |
| LTBP1i3F     | CCCTCGGCTTTGAACCAA         |
| LTBP1i3R     | AAGGATTCAGCAACTTGAAGGT     |
| LTBP1+550kbF | TGCAGCCTGCCTCATCTG         |
| LTBP1+550kbR | CAACAAACGAGGCATACACTACAAG  |
| MAPK9+56kbF  | GGGCGTCAGGTATGCAAAC        |
| MAPK9+56kbR  | TTCTCAGGGTTCCTTTCAGTATT    |
| MAPK9-41kbF  | CAGGAGGAATCCACAGTGTGTCT    |
| MAPK9-41kbR  | CGCCACCCCAACCCTATT         |
| MAPK9e4F     | GCTCCATGTGAATAACCTGACATAA  |
| MAPK9e4R     | CCTTTTCTCCCTCAGGTATTTGG    |

| Primer Name  | Primer Sequence 5' -> 3'    |
|--------------|-----------------------------|
| MAPK9-161kbF | TTGACGGCACTAGAAAGCAAAG      |
| MAPK9-161kbR | GCGCGGGCTTCCAAGT            |
| MAPK9-180kbF | GAGTCGGTGGTGAAGCACAA        |
| MAPK9-180kbR | CATGAGAGAGGAAGGCCTGAGA      |
| MTHFD1e1F    | GGGTTGGGTTGTCCTGCTT         |
| MTHFD1e1R    | CGATGGACACCACCAATATCG       |
| MTHFD1e9F    | GTTTTGATTTCTCCCCACTTG       |
| MTHFD1e9R    | CACCCACAACTTTTCTCCATT       |
| MTHFD1e27F   | TGCATGTCTGTTTACTTTAGTGACGTT |
| MTHFD1e27R   | TGCAACACCAAGATGGCAAA        |
| MTHFD1+85kbF | CAATTTATCAGTGCTGGTGTCA      |
| MTHFD1+85kbR | CATGAAACACCTTAAATGCTCAT     |
| MYH11e1F     | CCCAGCCTTCCCAACTC           |
| MYH11e1R     | TCACAATGTCGTTGGCTTTTCT      |
| MYH11e42F    | ATAACTCTACGCTCCAGACCTTCT    |
| MYH11e42R    | AACCCACAGGCGAGGAAAC         |
| MYH11e2F     | TGGTCCCTGTGGAATAAGG         |
| MYH11e2R     | CTTCCGGGCTTGGTTGTG          |
| PAX8e13F     | CGGGAAAGAAAGGCGAGTTT        |
| PAX8e13R     | GGCTTGGGCTGTGCTTTG          |
| PAX8e2F      | CAGCCCTCCATGGCCTAAG         |
| PAX8e2R      | CAAACCTCTACCTGACCCTGACA     |
| PAX8e1F      | CTGGGCCCGGTGTCTCT           |
| PAX8e1R      | GGTGATGCCGGGTGGAT           |
| PAX8-50kbF   | TGCAAATCATACCCGCTTGA        |
| PAX8-50kbR   | AATGCTCATTAGCCCTGATTGG      |
| PRKG1i3aF    | CCTGGGAGGGTGGAGTATTACA      |
| PRKG1i3aR    | CACAAAGGAAAACACCACACACA     |
| PRKG1i3bF    | CCTATGCGGGAGTTTGAACCTG      |
| PRKG1i3bR    | AAAAGAGCCCTGAACACTAAAAATTT  |
| PRKG1i3cF    | AAATGGCTGTACAATGGTACAA      |
| PRKG1i3cR    | CGTTTCCAGACAGCGTTTCCAG      |
| PRKG1i3dF    | GCTGCCAGTGGGTA AAAAGG       |
| PRKG1i3dR    | AATCACGGAAGTCACAAAGCATT     |
| PTPRDe11F    | CAGCGAGTCTGTCCGATCTG        |
| PTPRDe11R    | CCCCTTTTCAGGCTCTGA          |
| PTPRDi10aF   | TGCCATTTCTTGGCTTT           |
| PTPRDi10aR   | AGGAGGGAGAAGGCCCTACA        |
| PTPRDi10bF   | AATGGTGTGAGAGGTGAACAACA     |
| PTPRDi10bR   | TTGTGGTGGAGGGGAGCAAAT       |
| PTPRDi10cF   | TCTCATTTGCGTTCTTGAAAAA      |
| PTPRDi10cR   | GCTGACCGTTTCTTTGTACATGAA    |
| RCAN1e1F     | GCATCCTGTTTGGACAGCAA        |
| RCAN1e1R     | CCTGTCTGCCTGCAAGCAT         |
| RCAN1e4F     | TCGCTGCGTGCAATTCAT          |
| RCAN1e4R     | CTGAGTGACCCTGCGATTATTTT     |
| RCAN1-58kbF  | GGATTTTCTCTGGTATTGGAA       |
| RCAN1-58kbR  | TGCTGAGTTCACACAGTTGCTTAA    |
| RCAN1-170kbF | GGTGGTGGCTGGCTCTGT          |
| RCAN1-170kbR | TGTCCTTCAATTGGACTTTTTGC     |
| RCAN1-163kbF | GAACCAGGCACAGAGAAAGTAGAAG   |
| RCAN1-163kbR | GGGCATTGAGAATCTCTGGTAATT    |
| RCAN1i2F     | TGGGCTCAGGAGTGATTTCTCT      |
| RCAN1i2R     | TCCCTGTGGCCAAGCAA           |
| RHOu+70kbF   | CTGGGAAAGTGGACGTTGGT        |
| RHOu+70kbR   | AGCAAGTATGAAACCCCTCCTAAA    |
| RHOu+80kbF   | AGCAGCCTTGCCTATGCA          |

| Primer Name   | Primer Sequence 5' -> 3'    |
|---------------|-----------------------------|
| RHOu+80kbR    | GCTGATTCTGGGAACCAGTTATG     |
| RHOu-62kbF    | AGGTAGCAGCAGCCCGATT         |
| RHOu-62kbR    | AGTAAAGAATAAGCTGTGGCAGTTCA  |
| RHOu-82kbF    | AGGCCTTTTGGTGCTTACCA        |
| RHOu-82kbR    | TCTGCCTCTCTCTATTTCAGTCA     |
| RHOue2F       | CGTGAGACTCCAACCTCTGTGACA    |
| RHOue2R       | CCCAGCACTGAGCTGTAACG        |
| SLC2A14-5'F   | CATGGCCTTCAGAAGAAGTTAAGAT   |
| SLC2A14-5'R   | ACACTGGTTGCTGTAGCAGAAACTA   |
| SLC2A14i7F    | AGCATCATCTGTCCAGTCTTCATC    |
| SLC2A14i7R    | GCCTAATGTCCAGAGTGGGAAT      |
| SLC2A3e9F     | GGCCACAATAAACCCAGGGAAT      |
| SLC2A3e9R     | GCTATCTTGGTCTTTGTAGCCTTCTT  |
| SLC2A3e1F     | TTTTTCAGCCAACAAAACCTTCA     |
| SLC2A3e1R     | TCCTGAGGACGTGGAGAAAACCT     |
| SLC2A3-3'F    | CACAACAGAGGCAAGGGTACATAT    |
| SLC2A3-3'R    | AAGAAGGAGCAAATGCCAAGTT      |
| TRIM54+102kbF | CCCCTCTCCAGTGTTTTCA         |
| TRIM54+102kbR | GGGTTTGCAGGAGTCTGAGAGT      |
| TRIM54+126kbF | TCTCAGGTGAATCAACGGAATG      |
| TRIM54+126kbR | CCTCTGTATCCATGGCCAGGTA      |
| TRIM54-198kbF | TCTCACAGGTCCTCAAGGTGAA      |
| TRIM54-198kbR | TCACTTCTCCCTCCAGAATCAAA     |
| TRIM54-242kbF | TGAGGGTTGTGGGTCTAAGCTT      |
| TRIM54-242kbR | TGAGTATGCACGTGAGTAGCTGTG    |
| TRIM54-255kbF | GCCATGTGTCCCTCAACTGA        |
| TRIM54-255kbR | GGTGCATGGGAGGTGGAA          |
| TRIM54e4F     | TTCTTAGGACCCTTCATGCTTAAAG   |
| TRIM54e4R     | GGAGTGCAGCGGCCTAGAG         |
| 15q11.2aF     | GTGTGCTGGAGAAAGGATGCT       |
| 15q11.2aR     | CCATCAGGCAGGCAAATAATC       |
| 15q11.2bF     | CCTGGCTGTGGAAGGTGACT        |
| 15q11.2bR     | TGTCAGTGACCAAGCCATCTG       |
| 15q11.2cF     | TCCGCCATGTAAATTACGAGTTC     |
| 15q11.2cR     | GATGTGGCCCCGACTCT           |
| 15q11.2dF     | GCAACAAGGCCTGCAGGTAT        |
| 15q11.2dR     | TGTGTCTCCAAATGGGCAGTT       |
| 17q12aF       | CATGGCGTCGCTCAAATGTA        |
| 17q12aR       | TGGGCTTCTCCAAGCAGATC        |
| 17q12bF       | CCCCCTGCAGCAGCAA            |
| 17q12bR       | GAGCTAAATTTCCGCAGCAATAA     |
| 17q12cR       | CCCATCTTCCAGCCCTGAA         |
| 17q12cR       | TCCTCGCACTCGCCACTAG         |
| 17q12dF       | GGGCTTGGTTGGTGGGTAA         |
| 17q12dR       | GAGGGCCAGGGATCATCAC         |
| 18q11aF       | GGTTGTCCCTGACTCATTGTCA      |
| 18q11aR       | ACCATTCTGTGCCATCATCACA      |
| 18q11.2bF     | CACATGCGCTCCACAAGTG         |
| 18q11.2bR     | GCAGACACACAAAATTCAAATATTACA |
| 18q11cF       | CCGCTGTGACTGCTTTCCA         |
| 18q11cR       | AGAACATCATGGTGGCTTTCAA      |
| 18q11dF       | TGGATAGGCTCATCAGGATCAA      |
| 18q11dR       | TGCAAACCCACCATGTCTATC       |
| 18q11eF       | CCATGTGCCTGTCTCTT           |
| 18q11eR       | CCTGCCAAAGCCCTTTAG          |
| 18q11fF       | GCAGAATTCGGAAGTGAAGAAGAC    |
| 18q11fR       | TTGCACGCAAATCCTGTGA         |
